# Supplementary material
Source: publisher figshare collection journal article supplement (https://sage.figshare.com/ndownloader/files/23017727)
Supplement: Supplementary file 1 [file 23017727]

# **Assessing Technological Change in Agri-Food Systems of the Global South: A Review of Adoption-impact Studies in Wheat**

## **Supplementary Materials**

## **Supplementary Text.**

### **Major Research-and-Development Interventions in Wheat Agri-food Systems of the Global South**

The development and release of improved and high yielding varieties that are resistant to diseases and pests are widely considered as the significant research-and-development (R&D) interventions in response to the critical challenges faced in global food production (Gollin et al., 2018). The existing studies on the impact of wheat breeding research in the developing countries have shown a prominent role of CGIAR Centers, which continue to produce high rates of return (Heisey et al., 2003; Lantican et al., 2016). While there has been no slowdown in the rate of release of disease resistant, drought tolerant, biofortified and yield-enhancing varieties (Aktar-Uz-Zaman et al., 2017), a large portion of wheat area in many developing countries is still cultivated with landraces and older improved varieties (Atlin et al., 2017; Krishna et al., 2016; Yigezu et al., 2019b). The slow varietal turnover has shown to lower system productivity and enhance vulnerability to pests and diseases (Atlin et al., 2017). The slowdown of public and private investments in agricultural extension has worsened the situation (Pan et al., 2018). However, in many cases, the varietal traits that are preferred by farmers (who are also consumers) could not be delivered by new, improved varieties (e.g., taste), resulting in persistence of old improved varieties and landraces (Dalton, 2004; Weltzien and Rattunde, 2020). Against the backdrop of high demand heterogeneity and dynamic nature of production challenges faced by wheat farmers, one of the significant global challenges for the R&D actors is transferring the relevant germplasm and the associated information quickly into the hands of the world's poor, such as those living in South Asia and sub-Saharan Africa.

Another major area of CGIAR intervention with National Agricultural Research Systems (NARS) is 'sustainable intensification.' Under this umbrella term, several improved agronomic practices are developed and disseminated alongside improved varieties to produce more output while using potentially fewer resources on existing agricultural land and reducing adverse environment or ecosystem impacts (Pretty and Bharucha, 2014). The adoption of improved crop varieties and the creation of enabling environment through better market institutions are two essential components of sustainable agricultural systems. Still central to this concept is several improved agronomic practices that reduce production costs (Giller et al., 2015; Kotu et al., 2017). Zero-tillage with residue retention for soil cover is one such technology found to generate considerable agronomic and economic benefits while improving the environmental footprint of the production systems (El-Shater et al., 2016; Keil et al., 2017; Krishna and Veetil, 2014).

Developing micronutrient-enriched wheat through a combination of breeding and agronomic practices has been gaining importance in recent years. Foliar application of

micro-nutrients, for example, has shown significant welfare implications for increasing not only crop yield but also the micronutrient content in the grains (Ram et al., 2015). Consumption of zinc-enriched wheat is supposed to ameliorate the lack of this nutrient in the food, which imposes a severe economic burden among the poor in the global South (Ram et al., 2016). Another critical intervention is system diversification with crops like millets and legumes, which would enhance not only system productivity but also the nutritional status of subsistence farm-households in rural areas (Birtchal et al., 2015; Hossain et al., 2016). Despite their relevance, these technologies have so far received less research focus on adoption and impact studies. However, the scenario may change shortly with increased R&D attention to the quality of diets and its impacts on human welfare and planetary health (Willett et al., 2019). There is also mounting evidence on the detrimental effects of the heat and drought stress on the nutritional quality of wheat, especially lowering the concentrations of zinc and iron (Guzmán et al., 2016; Myers et al., 2014; Velu et al., 2016). These trends may necessitate new technological interventions shortly and would also shape the socioeconomic research on technology changes and wheat value chains.

Integrated management of crop pests including insects and weeds (Hassanali et al., 2008; Landis et al., 2016) and reduction of harvest and post-harvest losses (Khader et al., 2019; Tefera et al., 2011) are also other components of sustainable intensification that are gaining momentum, especially in the face of climate change and rapidly growing world population. Sustainable intensification can be a reality only when improved crop varieties along with the associated optimal agronomic management practices and better and enabling institutional, policy and market environments are in place (Pretty et al., 2018; Pretty and Bharucha, 2014).

The technological interventions in agriculture are often evaluated against the R&D investments to show how they led to desirable economic, social and environmental outcomes (Hurley et al., 2014; Pardey et al., 2016). In general, most of these studies have shown significantly high returns of R&D investments (Alston et al., 2012; Renkow and Byerlee, 2010). The CGIAR-related varieties are estimated to be cultivated in 64% of the wheat area in the developing countries (Lantican et al., 2016). The adoption of CGIAR varieties has resulted in a substantial increase in yields, improved grain quality, reduced yield variability, and improved tolerance to biotic and abiotic stresses (Byerlee and Dubin, 2010). Some researchers have observed that the distribution of impacts from agricultural R&D, in general, is highly skewed, and the high rates of return calculated for individual cases of success are unlikely to be representative of the overall portfolios (Maredia and Raitzer, 2010). Furthermore, aggregate rates of return in monetary terms are less useful while reporting on the attainment of desirable livelihoods and ecological impacts, including reduced poverty, improved food and nutrition security, improved natural resource and ecosystem services (Stevenson et al., 2018). Given that benefits from individual investments vary widely, targeting of investments is also required to generate the most exceptional livelihood and/or environmental impacts.

Only a few studies have addressed the environmental, poverty, and health impacts of R&D investments in wheat (Maredia and Raitzer, 2010). Nalley et al. (2010) examined the reduction in wheat yield variability due to CIMMYT-bred cultivars in the Yaqui Valley of Mexico. Marasas et al. (2003) showed the economic impact of the rust resistance by the wheat breeding program of CIMMYT. Gollin et al. (2018a) examined the impacts of Green Revolution technologies on national income of 84 countries during the 1960-2000 period. Available data have likely limited extending macro-impact studies to these broader dimensions. Sustainable intensification has also received relatively less attention in the field of macro-economic impact assessments (Renkow and Byerlee, 2010). While several location-specific and system-specific studies have quantified the yield advantages due to germplasm improvements, few have addressed the aggregate impacts of R&D on agronomic practices, management techniques, and, more importantly, technology packages combining improved varieties and optimal agronomic and management practices. Technology-driven intensification is also land-saving with the potential to arrest deforestation if accompanied by more robust regulatory frameworks (Byerlee et al., 2014; Stevenson et al., 2013).

**Supplementary Table S1. Technology adoption studies in wheat production systems (2008-2017)**

| <b>(Study)</b>            | <b>Country</b> | <b>Technology</b>                                    | <b>Data sources</b>                                                       | <b>Data type</b> | <b>Analytical tool</b>                    | <b>Remarks</b>                                                                  |
|---------------------------|----------------|------------------------------------------------------|---------------------------------------------------------------------------|------------------|-------------------------------------------|---------------------------------------------------------------------------------|
| (Ali and Erenstein, 2017) | Pakistan       | climate change adaptation practices                  | farm survey (n =950)                                                      | cross-sectional  | probit, censored least absolute deviation | determinants of use and number of practices used.                               |
| (Abay et al., 2017)       | Ethiopia       | chemical fertilizers, improved seeds, and irrigation | farm survey (n =7500)                                                     | longitudinal     | multivariate probit                       | implication of farmers' locus of control on their technology adoption decisions |
| (Keil et al., 2017)       | India          | conservation tillage                                 | farm survey (n = 990)                                                     | cross-sectional  | probit with sample selection              | determinants of adoption correcting non-exposure bias.                          |
| (Rahut and Ali, 2017)     | Pakistan       | climate-risk mitigating strategies                   | farm survey (n =500)                                                      | cross-sectional  | multivariate probit                       | determinants of choice of adaptation strategies by farmers                      |
| (Joshi et al., 2017)      | Nepal          | climate-risk adaptation                              | farm survey (n =120)                                                      | cross-sectional  | logit                                     | determinants of climate change adaptation technologies and practices            |
| (Mottaleb et al., 2016)   | Bangladesh     | scale-appropriate machinery                          | agricultural census (n = 25.35 million) and sub-sample (n = 1.16 million) | cross-sectional  | multinomial probit                        | determinants of ownership of machineries.                                       |
| (Singh et al., 2016)      | India          | zero tillage                                         | farm survey (n =40)                                                       | cross-sectional  | logit                                     | determinants and reasons for adoption                                           |
| (Ali et al., 2016)        | Pakistan       | irrigation                                           | farm survey (n = 950)                                                     | cross-sectional  | multivariate probit                       | determinants of farmers' choice of water pumps.                                 |
| (Kumar et al., 2016)      | India          | zero tillage                                         | farm survey (n =240)                                                      | cross-sectional  | descriptive                               | knowledge, attitude, and perception toward technology                           |
| (Keil et al., 2016)       | India          | conservation tillage                                 | survey among service providers (n = 277) and farmers (n = 991)            | cross-sectional  | Heckman selection                         | determinants and profitability of conservation tillage service provision.       |
| (Nazli and Smale, 2016)   | Pakistan       | new varieties                                        | farm survey (n =1116)                                                     | time-series      | duration model                            | demand for varietal traits; farmer heterogeneity.                               |

| <b>(Study)</b>          | <b>Country</b>                     | <b>Technology</b>                | <b>Data sources</b>                                                  | <b>Data type</b> | <b>Analytical tool</b>          | <b>Remarks</b>                                                     |
|-------------------------|------------------------------------|----------------------------------|----------------------------------------------------------------------|------------------|---------------------------------|--------------------------------------------------------------------|
| (Teshome et al., 2016a) | Ethiopia                           | soil and water conservation      | farm survey (n =272)                                                 | cross-sectional  | ordered probit                  | adoption phases                                                    |
| (Meena et al., 2016)    | India                              | zero tillage                     | farm survey (n =180)                                                 | cross-sectional  | multinomial logit               | reasons for non- and dis-adoption and constraints in adoption      |
| (Krishna et al., 2016)  | India                              | new varieties                    | secondary data from public seed sector                               | time series      | descriptive                     | trend in demand for breeder seeds and production.                  |
|                         |                                    |                                  | farm survey (n =323)                                                 | cross-sectional  | ordinary least squares          | determinants of varietal turnover in farmers' field.               |
| (Teshome et al., 2016b) | Ethiopia                           | sustainable land management      | farm survey (n =300)                                                 | cross-sectional  | multivariate probit             | role of farmer perceptions on investment                           |
| (Ali et al., 2015)      | Pakistan                           | certified seeds                  | farm survey (n =367)                                                 | cross-sectional  | binary variable (not specified) | adoption modelling as a preliminary step for impact assessment     |
| (Mahmood et al., 2015)  | Pakistan                           | water-saving technologies        | farm survey (n =270)                                                 | cross-sectional  | none                            | adoption level of water-saving irrigation interventions            |
| (Magnan et al., 2015)   | India                              | laser land leveling              | randomized control trial (n = 478)                                   | experimental     | ordinary least squares          | role of heterogeneous information on adoption.                     |
| (Shiferaw et al., 2014) | Ethiopia                           | improved varieties               | farm survey (n = 2017)                                               | cross-sectional  | probit                          | determinants and impacts of farmer adoption of improved varieties. |
| (Singh et al., 2012)    | Bangladesh, India, Nepal, Pakistan | resource-conserving technologies | village survey (n = 56)                                              | cross-sectional  | descriptive                     | extent of exposure and adoption of technologies                    |
| (Kassie et al., 2011)   | Ethiopia                           | soil conservation                | farm survey (n=148)                                                  | cross-sectional  | logit                           | adoption modelling as a preliminary step for impact assessment     |
| (Erenstein, 2010a)      | India, Pakistan                    | conservation tillage             | secondary data, supply-side surveys (n = 78), farm surveys (n = 858) | cross-sectional  | descriptive                     | presents a triangulation approach to assess technology diffusion.  |

| <b>(Study)</b>                | <b>Country</b>  | <b>Technology</b>                                      | <b>Data sources</b>                                 | <b>Data type</b> | <b>Analytical tool</b> | <b>Remarks</b>                                        |
|-------------------------------|-----------------|--------------------------------------------------------|-----------------------------------------------------|------------------|------------------------|-------------------------------------------------------|
| (Erenstein, 2010b)            | India           | conservation tillage                                   | village survey (n = 170)                            | case-studies     | descriptive            | village surveys to explore technology dynamics.       |
| (Matuschke and Qaim, 2009)    | India           | new varieties                                          | farm survey (n =282)                                | cross-sectional  | Tobit, probit          | effect of social networks on adoption                 |
| (Erenstein and Farooq, 2009)  | India, Pakistan | conservation tillage                                   | farm survey (n = 527)                               | cross-sectional  | bivariate analysis     | determinants of adoption and dis-adoption .           |
| (Kassie et al., 2009)         | Ethiopia        | conservation tillage, compost and chemical fertilizers | farm survey (n = 130) and plot-level data (n = 348) | cross-sectional  | trivariate probit      | estimated inter-dependence adoption of 3 practices.   |
| (Singh et al., 2008)          | India           | zero tillage                                           | farm survey (n =100)                                | cross-sectional  | descriptive            | knowledge, attitude, and perception toward technology |
| (Torkamani and Shajari, 2008) | Iran            | Irrigation                                             | farm survey (n =187)                                | cross-sectional  | probit                 | relative risk premiums to estimate adoption model     |

**Supplementary Table S2. Technology impact studies in wheat production systems (2008-2017)**

| (Study)                       | Country    | Technology                          | Data sources                  | Data type       | Method to address the selection bias | Key output/outcome variable(s)                         |
|-------------------------------|------------|-------------------------------------|-------------------------------|-----------------|--------------------------------------|--------------------------------------------------------|
| (Ali and Erenstein, 2017)     | Pakistan   | climate change adaptation practices | farm survey (n =950)          | cross-sectional | matching                             | food security, poverty                                 |
| (Abro et al., 2017)           | Ethiopia   | rust-resistant varieties            | farm survey (n =2069)         | 2-year panel    | panel data (fixed effects)           | Yield                                                  |
| (Ali et al., 2017)            | Pakistan   | Irrigation                          | farm survey (n =917)          | cross-sectional | matching                             | yield, income, poverty, land rent, water scarcity      |
| (Rahut and Ali, 2017)         | Pakistan   | climate-risk mitigating strategies  | farm survey (n =500)          | cross-sectional | matching                             | yield, income, poverty                                 |
| (Kathpalia and Chander, 2017) | India      | agricultural machinery              | farm survey (n =100)          | cross-sectional | none                                 | NA (simple tabulation of farmer perceptions)           |
| (Singh, 2017)                 | India      | resource-conserving technologies    | farm survey (n =240)          | cross-sectional | none                                 | yield, net income                                      |
| (Singh et al., 2016)          | India      | zero tillage                        | farm survey (n =40)           | cross-sectional | none                                 | yield, net income                                      |
| (Khatri-Chhetri et al., 2016) | India      | climate change adaptation practices | farm survey (n = 1267)        | cross-sectional | none                                 | input costs, grain yield                               |
| (El-Shater et al., 2016)      | Syria      | zero tillage                        | farm survey (n=621)           | cross-sectional | endogenous switching, matching       | net returns and wheat consumption                      |
| (Rahut et al., 2016)          | Pakistan   | Irrigation                          | farm survey (n =950)          | cross-sectional | matching                             | food security, income, poverty                         |
| (Aryal et al., 2016)          | India      | zero tillage                        | farm survey (n =208)          | 2-year panel    | none                                 | grain yield (under normal and excess rainfall)         |
| (Keil et al., 2015)           | India      | zero tillage                        | farm survey (n =1444)         | cross-sectional | none                                 | grain yield                                            |
| (Aravindakshan et al., 2015)  | Bangladesh | conservation tillage                | farm survey (n =328)          | cross-sectional | none                                 | energy use efficiency                                  |
| (Aryal et al., 2015a)         | India      | laser leveling                      | farm survey (n =198)          | cross-sectional | none                                 | grain yield, irrigation time                           |
| (Aryal et al., 2015b)         | India      | zero tillage                        | farmers field trials (n = 40) | 3-year panel    | none                                 | CO <sub>2</sub> emission, profits                      |
| (Krishna and Veettil, 2014)   | India      | zero tillage                        | farm survey (n =180)          | cross-sectional | none                                 | grain yield, cost of cultivation, technical efficiency |



| <b>(Study)</b>            | <b>Country</b>  | <b>Technology</b>                | <b>Data sources</b>    | <b>Data type</b> | <b>Method to address selection bias</b> | <b>Key output/outcome variable(s)</b>                 |
|---------------------------|-----------------|----------------------------------|------------------------|------------------|-----------------------------------------|-------------------------------------------------------|
| (Yigezu et al., 2014)     | Syria           | improved supplemental irrigation | farm survey (n=461)    | cross-sectional  | none                                    | quantity and value of irrigation water                |
| (Shiferaw et al., 2014)   | Ethiopia        | improved varieties               | farm survey (n = 2017) | cross-sectional  | endogenous switching, matching          | per capita food expenditure, food security indicators |
| (Lobell et al., 2013)     | India           | time of sowing                   | satellite imageries    | time series      | none                                    | grain yield                                           |
| (Yigezu et al., 2013)     | Syria           | sprinkler irrigation             | farm survey (n=385)    | cross-sectional  | none                                    | water use efficiency                                  |
| (Grover and Sharma, 2011) | India           | zero tillage                     | farm survey (n=120)    | cross-sectional  | none                                    | yield, profit, income                                 |
| (Kassie et al., 2011)     | Ethiopia        | soil conservation                | farm survey (n=148)    | cross-sectional  | matching                                | crop income                                           |
| (Erenstein, 2009)         | India, Pakistan | zero tillage                     | farm survey (n =858)   | cross-sectional  | within-farm comparison                  | input use, grain yield, profit                        |
| (Erenstein et al., 2008)  | India, Pakistan | zero tillage                     | farm survey (n =391)   | cross-sectional  | none                                    | yield, cost, profitability                            |

## Supplementary Table S3. Effects of Technology Adoption in Wheat

| Technology,<br>Study area                | Effects documented                                                                                                                                                                                                                                                                                                                                                                                                                        |
|------------------------------------------|-------------------------------------------------------------------------------------------------------------------------------------------------------------------------------------------------------------------------------------------------------------------------------------------------------------------------------------------------------------------------------------------------------------------------------------------|
| <b>Climate-smart agriculture</b>         |                                                                                                                                                                                                                                                                                                                                                                                                                                           |
| Pakistan                                 | Farmers who adopted more climate change adaptation practices had higher food security levels (8–13%) than non-adopters, and the adopters experienced lower levels of poverty (3–6%) (Ali and Erenstein, 2017).                                                                                                                                                                                                                            |
| Pakistan                                 | Adopters of climate-risk management strategies realized a higher wheat yield per hectare and income and low poverty levels, compared to non-adopters (Rahut and Ali, 2017).                                                                                                                                                                                                                                                               |
| India                                    | Climate-smart agricultural practices and technologies in smallholder farms generated significant impacts on total production costs and yield in rice-wheat system (Khatri-Chhetri et al., 2016).                                                                                                                                                                                                                                          |
| <b>Improved varieties/seeds</b>          |                                                                                                                                                                                                                                                                                                                                                                                                                                           |
| Ethiopia                                 | Improved rust-resistant wheat varieties raised effective yields by 8% in comparison to local susceptible varieties (Abro et al., 2017).                                                                                                                                                                                                                                                                                                   |
| Ethiopia                                 | Adoption of improved wheat varieties increased the probability of food security, per capita food consumption, and the probability of attaining the food breakeven and food surplus status (Shiferaw et al., 2014).                                                                                                                                                                                                                        |
| <b>Irrigation and water conservation</b> |                                                                                                                                                                                                                                                                                                                                                                                                                                           |
| Pakistan                                 | Farmers situated at the head of the water source experienced higher wheat yield. Household income levels were higher, and poverty levels were lower with irrigation water availability (Ali et al., 2017).                                                                                                                                                                                                                                |
| Pakistan                                 | Farmers without water scarcity problems achieved higher yield and household income and were food secure (Rahut et al., 2016).                                                                                                                                                                                                                                                                                                             |
| Syria                                    | A shift from traditional to improved supplemental irrigation contributed toward the overall effort of water conservation (418 m <sup>3</sup> of irrigation water saved per hectare per year). The shift also had farm-level economic benefits. The improved supplemental irrigation led to the highest farm level economic benefit (25% increase in farm profits) when jointly adopted with sprinkler technologies (Yigezu et al., 2014). |
| Syria                                    | The wheat farms could maintain the yield level with 9% less irrigation water by replacing the traditional surface canal irrigation schemes with sprinklers (Yigezu et al., 2013).                                                                                                                                                                                                                                                         |
| India                                    | Laser leveling in wheat fields reduced irrigation time by 10–12 hours per hectare per season and improved yield by 7–9 % in laser leveled fields (Aryal et al., 2015a).                                                                                                                                                                                                                                                                   |
| Ethiopia                                 | The net value of crop income for plots with 'Fanya Juu' terraces was lower than for plots without terraces (Kassie et al., 2011).                                                                                                                                                                                                                                                                                                         |

## Conservation agriculture and related technologies

|                 |                                                                                                                                                                                                                                                                                                                                                                                                                                 |
|-----------------|---------------------------------------------------------------------------------------------------------------------------------------------------------------------------------------------------------------------------------------------------------------------------------------------------------------------------------------------------------------------------------------------------------------------------------|
| India           | Significant cost savings (14%), pronounced productivity increase (5%), and small but significant improvement in the technical efficiency of production (1%) were associated with the adoption of zero tillage in wheat (Krishna and Veettil, 2014).                                                                                                                                                                             |
| India           | Zero tillage adoption in wheat increased yield and reduced the cost of production as compared with conventional farms. The practice also increased the income of farmers substantially and reduced poverty (Grover and Sharma, 2011).                                                                                                                                                                                           |
| India           | After the adoption of zero-tillage, CO <sub>2</sub> emission and irrigation water for the wheat crop were reduced by about 19 kg and 127 m <sup>3</sup> per hectare, respectively, as compared to the conventional method of wheat cultivation (Singh et al., 2016).                                                                                                                                                            |
| Syria           | Adoption of zero tillage led to a 33% increase in net crop income and a 34% gain in wheat consumption per adult equivalent per year (El-Shater et al., 2016).                                                                                                                                                                                                                                                                   |
| India           | The average wheat yield was higher under conservation agriculture than under conventional tillage during both bad and average years. However, the yield difference was two-fold higher during the bad year (16% vs. 8%) (Aryal et al., 2016).                                                                                                                                                                                   |
| India           | Zero tillage practices without full residue retention led to a 19% yield gain for wheat over conventional-tillage wheat. The economic benefit from Zero tillage related yield increase and cost savings in wheat production amounted to 6% of total annual income (Keil et al., 2015).                                                                                                                                          |
| India           | Zero tillage adopters could save wheat production costs (USD 79/ha) and increase net revenue (USD 98/ha) as compared to conventional tillage. The benefit-cost ratio under zero tillage was 1.43 against 1.31 under conventional tillage. Shifting from conventional tillage to zero tillage based wheat production reduced Greenhouse Gas emission by 1.5 Mg CO <sub>2</sub> -eq per hectare per season (Aryal et al., 2015b). |
| India, Pakistan | Significant resource-saving effects were observed in farmers' fields with zero tillage adoption in terms of diesel, tractor time, and cost savings for wheat cultivation. Water savings were less pronounced (Erenstein et al., 2008).                                                                                                                                                                                          |

## Farm-machinery

|            |                                                                                                                                                                                                                                                                                                                                   |
|------------|-----------------------------------------------------------------------------------------------------------------------------------------------------------------------------------------------------------------------------------------------------------------------------------------------------------------------------------|
| India      | With the adoption of minimum tillage with rotavator, the cost of cultivation and irrigation water used for wheat cultivation reduced. Crop yield, gross and net income, agronomic productivity, and net economic productivity increased (Singh, 2017).                                                                            |
| India      | Adopters of straw-reaper indicated that technology adoption had positive livelihood effects, including better asset status and higher expenditure on children's education (Kathpalia and Chander, 2017).                                                                                                                          |
| Bangladesh | Adoption of power-tiller operated seeding (PTOS) facilitated the highest 'energy input use efficiency score' in the rice-wheat farming system, followed closely by bed planting and strip tillage. The difference with traditional tillage was statistically significant for all these technologies (Aravindakshan et al., 2015). |

---

## Supplementary Figure S1. Selection of studies for inclusion in the systematic review

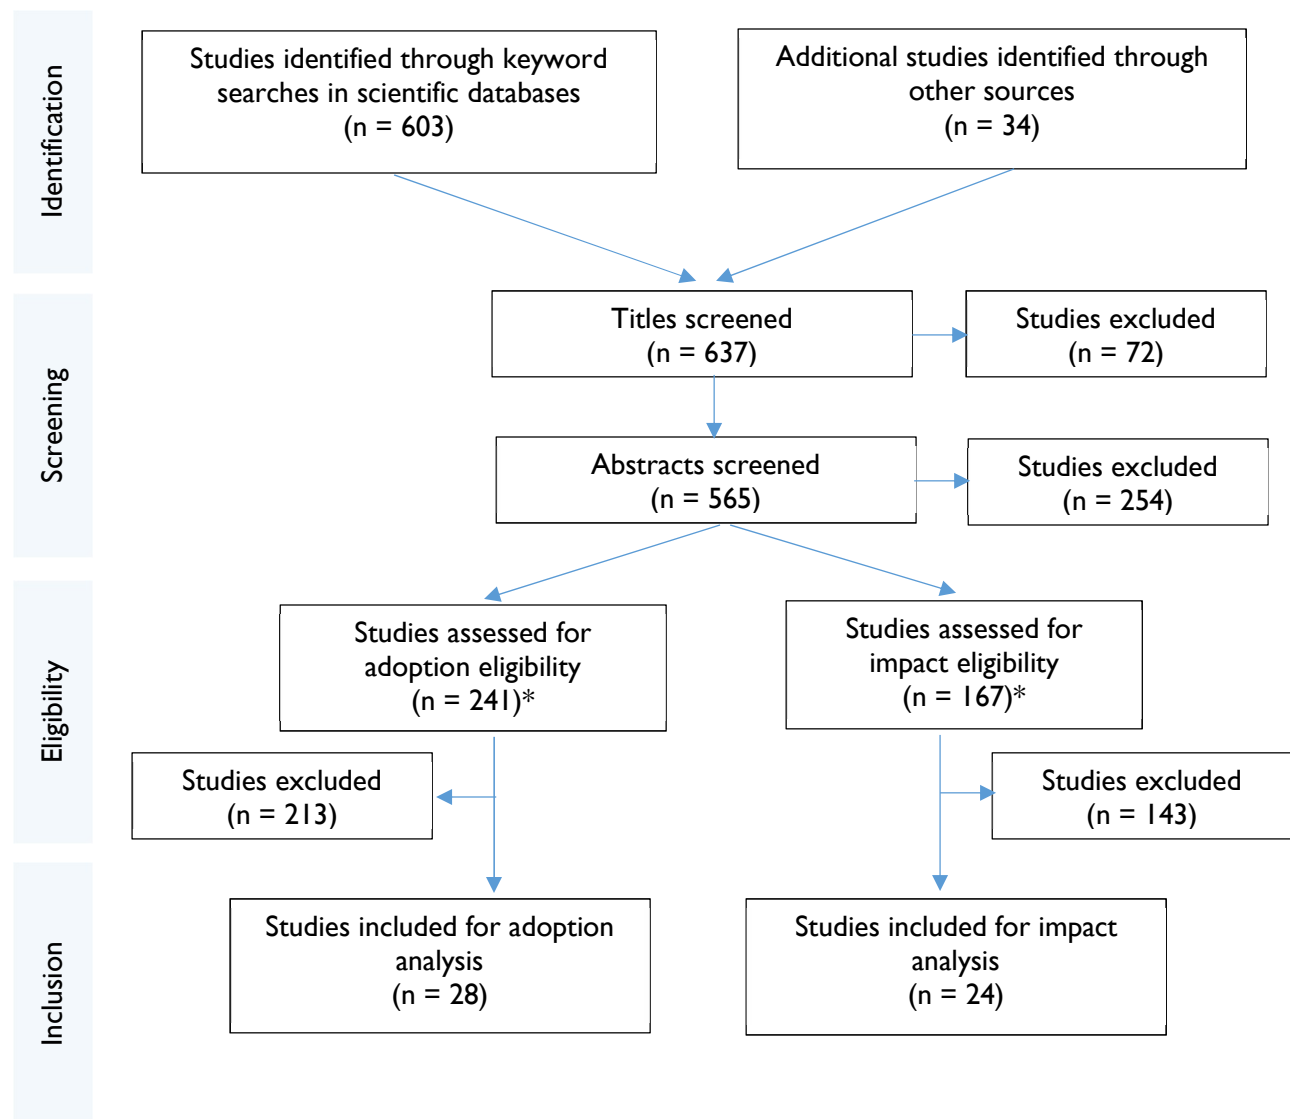

**Note:** The literature selection process was completed in two phases. In the first phase, studies for inclusion in the systematic review were identified through keyword searches. We identified the search terms iteratively. As the first step, a simple search with "Wheat" AND "technology adoption" OR "technology impact" was performed. Using the insights from this search, additional keywords were identified and included, and the detailed search was performed. In Scopus, for example, the search was done with 'Wheat AND (farmer OR smallholder OR household) AND (technology OR innovation OR intervention) AND (adoption OR acceptance OR use OR impact OR effect OR outcome OR change),' which resulted in 356 documents published between 2008 and 2017.

\* Several studies that were examined for impact eligibility were also examined for adoption eligibility.

## References

- Abay KA, Blalock G and Berhane G (2017) Locus of control and technology adoption in developing country agriculture: Evidence from Ethiopia. *Journal of Economic Behavior & Organization* 143: 98–115.
- Abro ZA, Jaleta M and Qaim M (2017) Yield effects of rust-resistant wheat varieties in Ethiopia. *Food Security* 68(2): 494.
- Aktar-Uz-Zaman M, Tuhina-Khatun M, Hanafi MM, et al. (2017) Genetic analysis of rust resistance genes in global wheat cultivars: An overview. *Biotechnology & Biotechnological Equipment* 31(3): 431–445.
- Ali A, Bahadur Rahut D and Behera B (2016) Factors influencing farmers' adoption of energy-based water pumps and impacts on crop productivity and household income in Pakistan. *Renewable and Sustainable Energy Reviews* 54: 48–57.
- Ali A and Erenstein O (2017) Assessing farmer use of climate change adaptation practices and impacts on food security and poverty in Pakistan. *Climate Risk Management* 16: 183–194.
- Ali A, Rahut DB, Behera B, et al. (2015) Farmers' access to certified wheat seed and its effect on poverty reduction in Pakistan. *Journal of Crop Improvement* 29(2): 247–265.
- Ali A, Rahut DB and Imtiaz M (2017) Implications of less tail end water on livelihoods of small farmers in Pakistan. *Outlook on Agriculture* 46(1): 36–43.
- Alston JM, Martin WJ and Pardey PG (2012) Influences of agricultural technology on the size and importance of food price variability. In: Chavas J-P, Hummels D and Wright BD (eds) *The economics of food price volatility*: Chicago, London: University of Chicago Press, pp. 13–54.
- Aravindakshan S, Rossi FJ and Krupnik TJ (2015) What does benchmarking of wheat farmers practicing conservation tillage in the eastern Indo-Gangetic Plains tell us about energy use efficiency? An application of slack-based data envelopment analysis. *Energy* 90: 483–493.
- Aryal JP, Mehrotra MB, Jat ML, et al. (2015a) Impacts of laser land leveling in rice–wheat systems of the north–western indo-gangetic plains of India. *Food Security* 7(3): 725–738.
- Aryal JP, Sapkota TB, Stirling CM, et al. (2016) Conservation agriculture-based wheat production better copes with extreme climate events than conventional tillage-based systems: A case of untimely excess rainfall in Haryana, India. *Agriculture, Ecosystems & Environment* 233: 325–335.
- Aryal JP, Sapkota TBEK, Jat ML, et al. (2015b) On-farm economic and environmental impact of zero-tillage wheat: A case of north-west India. *Experimental Agriculture* 51(01): 1–16.
- Atlin GN, Cairns JE and Das B (2017) Rapid breeding and varietal replacement are critical to adaptation of cropping systems in the developing world to climate change. *Global Food Security* 12: 31–37.
- Birthal PS, Roy D and Negi DS (2015) Assessing the impact of crop diversification on farm poverty in India. *World Development* 72: 70–92.
- Byerlee D and Dubin HJ (2010) Crop improvement in the CGIAR as a global success story of open access and international collaboration. *International Journal of the Commons* 4: 452–480.
- Byerlee D, Stevenson J and Villoria N (2014) Does intensification slow crop land expansion or encourage deforestation? *Global Food Security* 3(2): 92–98.

- Dalton TJ (2004) A household hedonic model of rice traits: Economic values from farmers in West Africa. *Agricultural Economics* 31(2-3): 149–159.
- El-Shater T, Yigezu YA, Mugeru A, et al. (2016) Does zero tillage improve the livelihoods of smallholder cropping farmers? *Journal of Agricultural Economics* 67(1): 154–172.
- Erenstein O (2009) Specification effects in zero tillage survey data in South Asia's rice–wheat systems. *Field Crops Research* 111(1-2): 166–172.
- Erenstein O (2010a) Triangulating technology diffusion indicators: Zero tillage wheat in south Asia's irrigated plains. *Experimental Agriculture* 46(03): 293–308.
- Erenstein O (2010b) Village surveys for technology uptake monitoring: Case of tillage dynamics in the Trans-Gangetic plains. *Experimental Agriculture* 46(03): 277–292.
- Erenstein O and Farooq U (2009) A survey of factors associated with the adoption of zero tillage wheat in the irrigated plains of south Asia. *Experimental Agriculture* 45(02): 133.
- Erenstein O, Farooq U, Malik RK, et al. (2008) On-farm impacts of zero tillage wheat in South Asia's rice–wheat systems. *Field Crops Research* 105(3): 240–252.
- Giller KE, Andersson JA, Corbeels M, et al. (2015) Beyond conservation agriculture. *Frontiers in Plant Science* 6: 870.
- Gollin D, Hansen CW and Wingender A (2018) *Two blades of grass: The impact of the Green Revolution: Working Paper Series No. 24744*.
- Grover DK and Sharma T (2011) Alternative resources conservative technologies in agriculture: Impact analysis of zero-tillage technology in Punjab. *Indian Journal of Agricultural Research* 45(4): 283–290.
- Guzmán C, Autrique JE, Mondal S, et al. (2016) Response to drought and heat stress on wheat quality, with special emphasis on bread-making quality, in durum wheat. *Field Crops Research* 186: 157–165.
- Hassanali A, Herren H, Khan ZR, et al. (2008) Integrated pest management: The push-pull approach for controlling insect pests and weeds of cereals, and its potential for other agricultural systems including animal husbandry. *Philosophical transactions of the Royal Society of London. Series B, Biological sciences* 363(1491): 611–621.
- Heisey PW, Lantican MA and Dubin HJ (2003) Wheat. In: Evenson RE and Gollin D (eds) *Crop variety improvement and its effect on productivity The impact of international agricultural research*: Oxon, UK, Cambridge, USA: CABI Publishing, pp. 47–69.
- Hossain MS, Hossain A, Sarkar MAR, et al. (2016) Productivity and soil fertility of the rice–wheat system in the High Ganges River Floodplain of Bangladesh is influenced by the inclusion of legumes and manure. *Agriculture, Ecosystems & Environment* 218: 40–52.
- Hurley TM, Rao X and Pardey PG (2014) Re-examining the reported rates of return to food and agricultural research and development. *American Journal of Agricultural Economics* 96(5): 1492–1504.
- Joshi B, Ji W and Joshi NB (2017) Farm households' perception on climate change and adaptation practices. *International Journal of Climate Change Strategies and Management* 9(4): 433–445.
- Kassie M, Kahlin G, Bluffstone R, et al. (2011) Are soil conservation technologies "win-win?" A case study of Anjeni in the north-western Ethiopian highlands. *Natural Resources Forum* 35: 89–99.

- Kassie M, Zikhali P, Manjur K, et al. (2009) Adoption of sustainable agriculture practices: Evidence from a semi-arid region of Ethiopia. *Natural Resources Forum* 33(3): 189–198.
- Kathpalia J and Chander S (2017) Socio-economic impact of agricultural technology on farmers with reference to straw reaper on wheat crop in Haryana. *Annals of Agri Bio Research* 22(2): 254-257.
- Keil A, D's ouza A and McDonald AJ (2015) Zero-tillage as a pathway for sustainable wheat intensification in the Eastern Indo-Gangetic Plains: Does it work in farmers' fields? *Food Security* 7(5): 983–1001.
- Keil A, D's ouza A and McDonald AJ (2016) Growing the service economy for sustainable wheat intensification in the Eastern Indo-Gangetic Plains: Lessons from custom hiring services for zero-tillage. *Food Security* 8(5): 1011–1028.
- Keil A, D's ouza A and McDonald AJ (2017) Zero-tillage is a proven technology for sustainable wheat intensification in the Eastern Indo-Gangetic Plains: What determines farmer awareness and adoption? *Food Security* 9(4): 723–743.
- Khader B, Yigezu YA, Duwayri M, et al. (2019) Where in the value chain are we losing food the most? The case of wheat in Jordan. *Food Security* forthcoming.
- Khatri-Chhetri A, Aryal JP, Sapkota TB, et al. (2016) Economic benefits of climate-smart agricultural practices to smallholder farmers in the Indo-Gangetic Plains of India. *Current Science* 110(7): 1251–1256.
- Kotu BH, Alene A, Manyong V, et al. (2017) Adoption and impacts of sustainable intensification practices in Ghana. *International Journal of Agricultural Sustainability* 15(5): 539-554.
- Krishna VV, Spielman DJ and Veettil PC (2016) Exploring the supply and demand factors of varietal turnover in Indian wheat. *The Journal of Agricultural Science* 154(02): 258–272.
- Krishna VV and Veettil PC (2014) Productivity and efficiency impacts of conservation tillage in northwest Indo-Gangetic Plains. *Agricultural Systems* 127: 126–138.
- Kumar A, Singh R, Dar SR, et al. (2016) Multidimensional impact assessment of zero tillage technology on wheat productivity in Haryana. *Journal of Food, Agriculture & Environment* 14(2): 85–90.
- Landis DA, Saidov N, Jaliov A, et al. (2016) Demonstration of an Integrated Pest Management program for wheat in Tajikistan. *Journal of Integrated Pest Management* 7(1): 1–9.
- Lantican MA, Braun H-J, Payne TS, et al. (2016) *Impacts of international wheat improvement research 1994-2014: International Maize and Wheat Improvement Center (CIMMYT), Mexico, D.F.*
- Lobell DB, Ortiz-Monasterio JI, Sibley AM, et al. (2013) Satellite detection of earlier wheat sowing in India and implications for yield trends. *Agricultural Systems* 115: 137–143.
- Magnan N, Spielman DJ, Lybbert TJ, et al. (2015) Leveling with friends: Social networks and Indian farmers' demand for a technology with heterogeneous benefits. *Journal of Development Economics* 116: 223–251.
- Mahmood N, Ali T, Ahmad M, et al. (2015) Identification of the adoption level of water saving interventions and reasons for Non Adoption in Faisalabad District. *Pakistan Journal of Agricultural Science* 52(2): 509–513.
- Marasas C, Smale M and Singh R (2003) The economic impacts of productivity maintenance research: Breeding for rust resistance in modern wheat. *Agricultural Economics* 29: 253–263.

- Maredia MK and Raitzer DA (2010) Estimating overall returns to international agricultural research in Africa through benefit-cost analysis: A "best-evidence" approach. *Agricultural Economics* 41(1): 81–100.
- Matuschke I and Qaim M (2009) The impact of social networks on hybrid seed adoption in India. *Agricultural Economics* 40(5): 493–505.
- Meena M, Rajesh T and Karma B (2016) Adoption and impact of zero tillage in the rice-wheat production system of Haryana. *Indian Journal of Agricultural Research* 50(6): 584–588.
- Mottaleb KA, Krupnik TJ and Erenstein O (2016) Factors associated with small-scale agricultural machinery adoption in Bangladesh: Census findings. *Journal of Rural Studies* 46: 155–168.
- Myers SS, Zanolletti A, Kloog I, et al. (2014) Increasing CO<sub>2</sub> threatens human nutrition. *Nature* 510(7503): 139–142.
- Nalley LL, Barkley AP and Featherstone AM (2010) The genetic and economic impact of the CIMMYT wheat breeding program on local producers in the Yaqui Valley, Sonora Mexico. *Agricultural Economics* 41(5): 453–462.
- Nazli H and Smale M (2016) Dynamics of variety change on wheat farms in Pakistan: A duration analysis. *Food Policy* 59: 24–33.
- Pan Y, Smith SC and Sulaiman M (2018) Agricultural extension and technology adoption for food security: Evidence from Uganda. *American Journal of Agricultural Economics* 100(4): 1012–1031.
- Pardey PG, Andrade RS, Hurley TM, et al. (2016) Returns to food and agricultural R&D investments in sub-Saharan Africa, 1975–2014. *Food Policy* 65: 1–8.
- Pretty J, Benton TG, Bharucha ZP, et al. (2018) Global assessment of agricultural system redesign for sustainable intensification. *Nature Sustainability* 1(8): 441–446.
- Pretty J and Bharucha ZP (2014) Sustainable intensification in agricultural systems. *Annals of Botany* 114(8): 1571–1596.
- Rahut DB and Ali A (2017) Coping with climate change and its impact on productivity, income, and poverty: Evidence from the Himalayan region of Pakistan. *International Journal of Disaster Risk Reduction* 24: 515–525.
- Rahut DB, Ali A, Imtiaz M, et al. (2016) Impact of irrigation water scarcity on rural household food security and income in Pakistan. *Water Science and Technology: Water Supply* 16(3): 675–683.
- Ram H, Rashid A, Zhang W, et al. (2016) Biofortification of wheat, rice and common bean by applying foliar zinc fertilizer along with pesticides in seven countries. *Plant and Soil* 403(1–2): 389–401.
- Ram H, Sohu VS, Cakmak I, et al. (2015) Agronomic fortification of rice and wheat grains with zinc for nutritional security. *Current Science* 109(6): 113891.
- Renkow M and Byerlee D (2010) The impacts of CGIAR research: A review of recent evidence. *Food Policy* 35(5): 391–402.
- Shiferaw B, Kassie M, Jaleta M, et al. (2014) Adoption of improved wheat varieties and impacts on household food security in Ethiopia. *Food Policy* 44: 272–284.



- Singh OP (2017) Sustainable groundwater management and enhancing wheat yield through resource conservation technologies: Empirical evidences from different agroclimatic zones of Uttar Pradesh, India. *International Journal of Agricultural and Statistics Science* 13(1): 67–73.
- Singh OP, Singh R, Lakra K, et al. (2016) Impact of zero tillage on environment and wheat productivity: Evidences from Gorakhpur District of eastern Uttar Pradesh, India. *International Journal of Agricultural and Statistics Science* 12(1): 21–28.
- Singh R, Erenstein O, Saharawat YS, et al. (2012) Adoption analysis of resource-conserving technologies in rice (*Oryza sativa*)-wheat (*Triticum aestivum*) cropping system of South Asia. *Indian Journal of Agricultural Sciences* 82(5): 405–409.
- Singh R, Kumar S, Kumar A, et al. (2008) Multidimensional impact assessment of zero tillage technology. *Indian Journal of Agricultural Research* 42(1): 13–18.
- Stevenson J, Macours K and Gollin D (2018) *The rigor revolution in impact assessment: Implications for CGIAR*. Rome, Italy: Independent Science and Partnership Council (ISPC).
- Stevenson JR, Villoria N, Byerlee D, et al. (2013) Green Revolution research saved an estimated 18 to 27 million hectares from being brought into agricultural production. *Proceedings of the National Academy of Sciences of the United States of America* 110(21): 8363–8368.
- Tefera T, Kanampiu F, Groote H de, et al. (2011) The metal silo: An effective grain storage technology for reducing post-harvest insect and pathogen losses in maize while improving smallholder farmers' food security in developing countries. *Crop Protection* 30(3): 240–245.
- Teshome A, Graaff J de and Kassie M (2016a) Household-Level Determinants of Soil and Water Conservation Adoption Phases: Evidence from North-Western Ethiopian Highlands. *Environmental Management* 57(3): 620–636.
- Teshome A, Graaff J de, Ritsema C, et al. (2016b) Farmers' perceptions about the influence of land quality, land fragmentation and tenure systems on sustainable land management in the North Western Ethiopian Highlands. *Land Degradation & Development* 27(4): 884–898.
- Torkamani J and Shajari S (2008) Adoption of new irrigation technology under production risk. *Water Resources Management* 22(2): 229–237.
- Velu G, Guzman C, Mondal S, et al. (2016) Effect of drought and elevated temperature on grain zinc and iron concentrations in CIMMYT spring wheat. *Journal of Cereal Science* 69: 182–186.
- Weltzien E and Rattunde F (2020) Gender and farmer preferences for varietal traits: Evidence and issues for crop improvement. In: Goldman I (ed.) *Plant Breeding Reviews: Volume 43*. New Jersey: John Wiley & Sons, Inc.
- Willett W, Rockström J, Loken B, et al. (2019) Food in the Anthropocene: The EAT-Lancet Commission on healthy diets from sustainable food systems. *The Lancet* 393(10170): 447–492.
- Yigezu AY, Ahmed MA, Shideed K, et al. (2013) Implications of a shift in irrigation technology on resource use efficiency: A Syrian case. *Agricultural Systems* 118: 14–22.
- Yigezu AY, Aw-Hassan A, Shideed K, et al. (2014) A policy option for valuing irrigation water in the dry areas. *Water Policy* 16(3): 520.
- Yigezu YA, Boughlala M, El-Shater T, et al. (2019) Analysis of the adoption, impacts, and seed demand of improved varieties. In: Bishaw Z, Yigezu YA, Niane A, Telleria RJ and Najjar D (eds) *Political economy of the wheat sector in Morocco: Seed systems, varietal adoption, and impacts*. Beirut, Lebanon: ICARDA, pp. 87–190.
